# Supplementary material for: Multiparametric physicochemical analysis of a type 1 collagen 3D cell culture model using light and electron microscopy and mass spectrometry imaging
Source: Springer Nature journal article supplement (doi:10.1038/s41598-025-93700-3), 2025-03-20
Supplement: MOESM1 [file 41598_2025_93700_MOESM1_ESM.pdf]

# Multiparametric physicochemical analysis of a type 1 collagen 3D cell culture model using light and electron microscopy and mass spectrometry imaging: supplementary information

Camilla Dondi<sup>1</sup>, Dimitrios Tsikritsis<sup>1</sup>, Jean-Luc Vorng<sup>1</sup>, Gina Greenidge<sup>1</sup>, Ibolya Kepiro<sup>1</sup>, Natalie A. Belsey<sup>1,2</sup>, Greg McMahon<sup>1</sup>, Ian S. Gilmore<sup>1</sup>, Maxim G. Ryadnov<sup>1</sup>, & Michael Shaw<sup>1,3\*</sup>

<sup>1</sup>National Physical Laboratory, Hampton Road, Teddington, TW11 0LW, UK

<sup>2</sup>School of Chemistry & Chemical Engineering, University of Surrey, Guildford GU2 7XH, UK

<sup>3</sup>Department of Computer Science, University College London, Gower Street, London, WC1E 6BT, UK

\*[mike.shaw@npl.co.uk](mailto:mike.shaw@npl.co.uk)

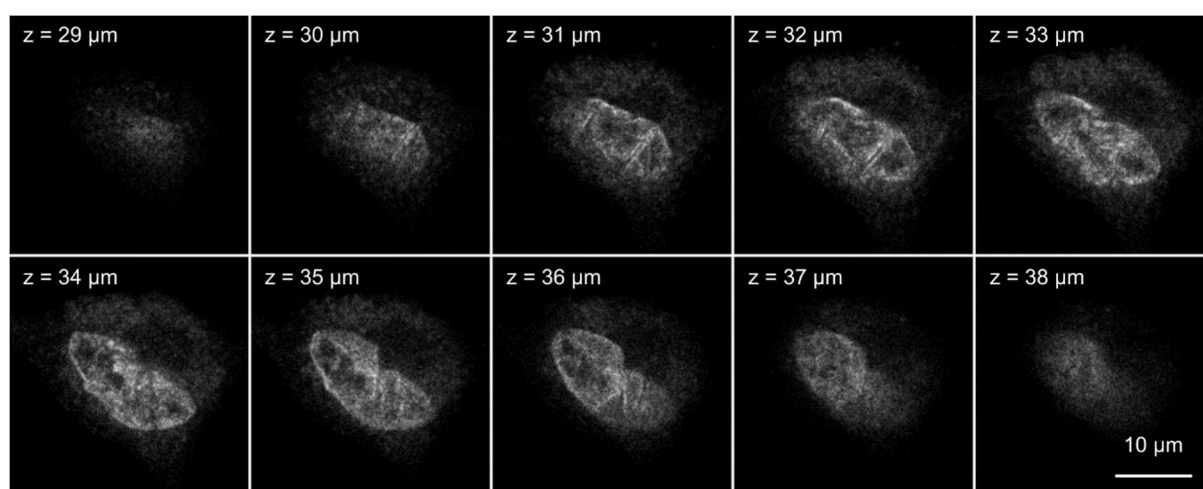

**Figure S1.** Sequential slices from a CLSFM z-stack showing the nucleus of the cell highlighted in Fig. 4(b) of the main manuscript.

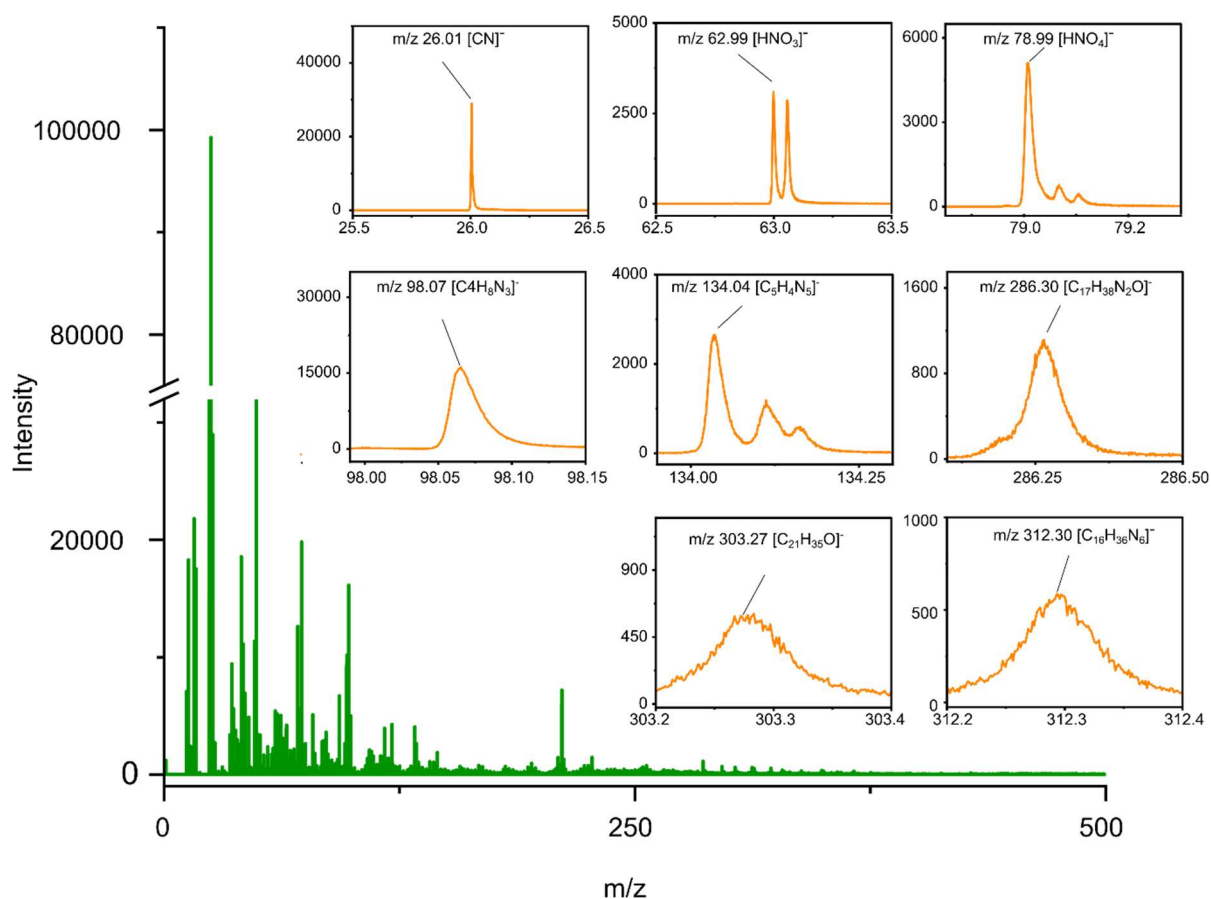

**Figure S2.** ToF-SIMS mass spectrum corresponding to the image field shown in Fig. 5(b) of the manuscript. Insets show the spectra corresponding to the individual ion images shown the figure.

| Experimental mass | Theoretical mass | Assignment                                                      | Mass deviation (ppm) |
|-------------------|------------------|-----------------------------------------------------------------|----------------------|
| 26.01             | 26.00            | [CN] <sup>-</sup>                                               | 76.91                |
| 62.99             | 63.00            | [HNO <sub>3</sub> ] <sup>-</sup>                                | -79.37               |
| 78.99             | 78.99            | [HNO <sub>4</sub> ] <sup>-</sup>                                | 12.65                |
| 98.07             | 98.07            | [C <sub>4</sub> H <sub>8</sub> N <sub>3</sub> ] <sup>-</sup>    | -20.39               |
| 134.04            | 134.05           | [C <sub>5</sub> H <sub>4</sub> N <sub>5</sub> ] <sup>-</sup>    | -52.22               |
| 286.30            | 286.30           | [C <sub>17</sub> H <sub>38</sub> N <sub>2</sub> O] <sup>-</sup> | 6.98                 |
| 303.27            | 303.27           | [C <sub>21</sub> H <sub>35</sub> O] <sup>-</sup>                | 3.29                 |
| 312.30            | 312.30           | [C <sub>16</sub> H <sub>36</sub> N <sub>6</sub> ] <sup>-</sup>  | -3.20                |

**Table S1.** Measured peak positions, theoretical masses of the assigned ions and mass deviation corresponding to the ToF-SIMS image channels shown in Fig. 5(b) of the manuscript.

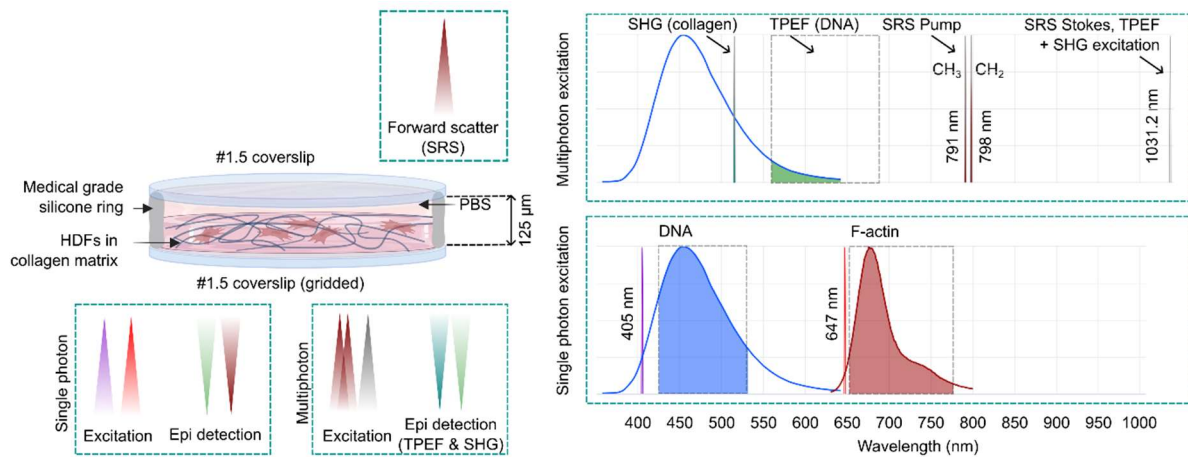

**Figure S3. Sample mounting and imaging geometry for optical microscopy techniques used in the correlative imaging workflow.** Type I collagen scaffolds seeded with HDFs were mounted between two #1.5 coverslips separated by a silicone spacer ring to allow illumination and light collection using oil immersion objective and condenser lenses for SRS imaging and reduce evaporation and maintain sample structure during multimodal optical imaging.

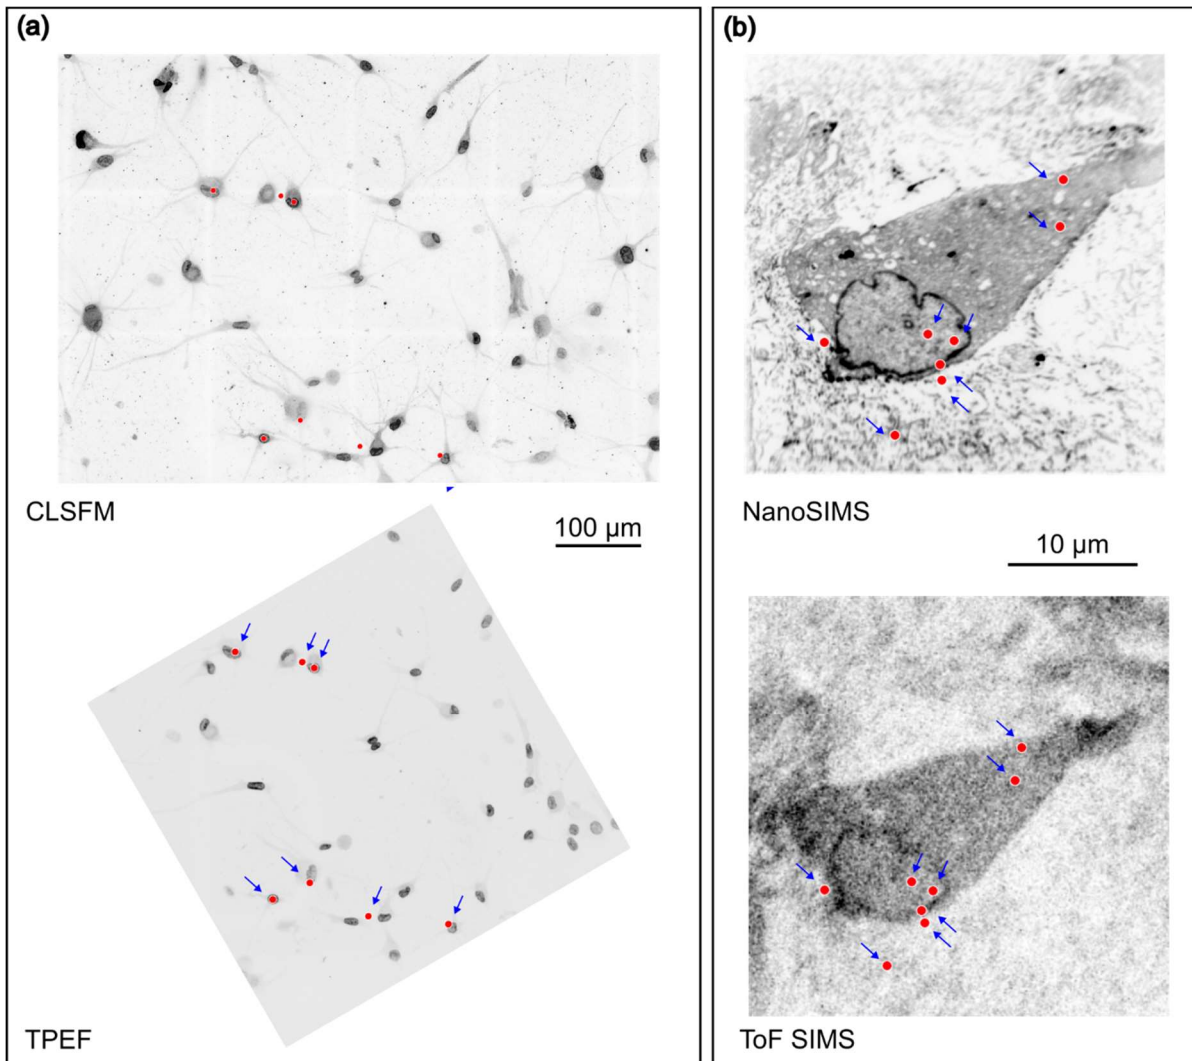

**Figure S4. Keypoints (red dots highlighted by blue arrows) used to register the images shown in figures 3(a) and 5 of the manuscript.** (a) CLSFM (top) and TPEF (bottom) images of cell nuclei stained with Hoechst. (b) Cyanide ion channel images captured using NanoSIMS (top) and ToF-SIMS (bottom).
